# Supplementary material
Source: publisher site journal article supplement (https://www.dovepress.com/article/578571)
Supplement: Supplementary file 1 [file 578571_supplementary%20material.docx]

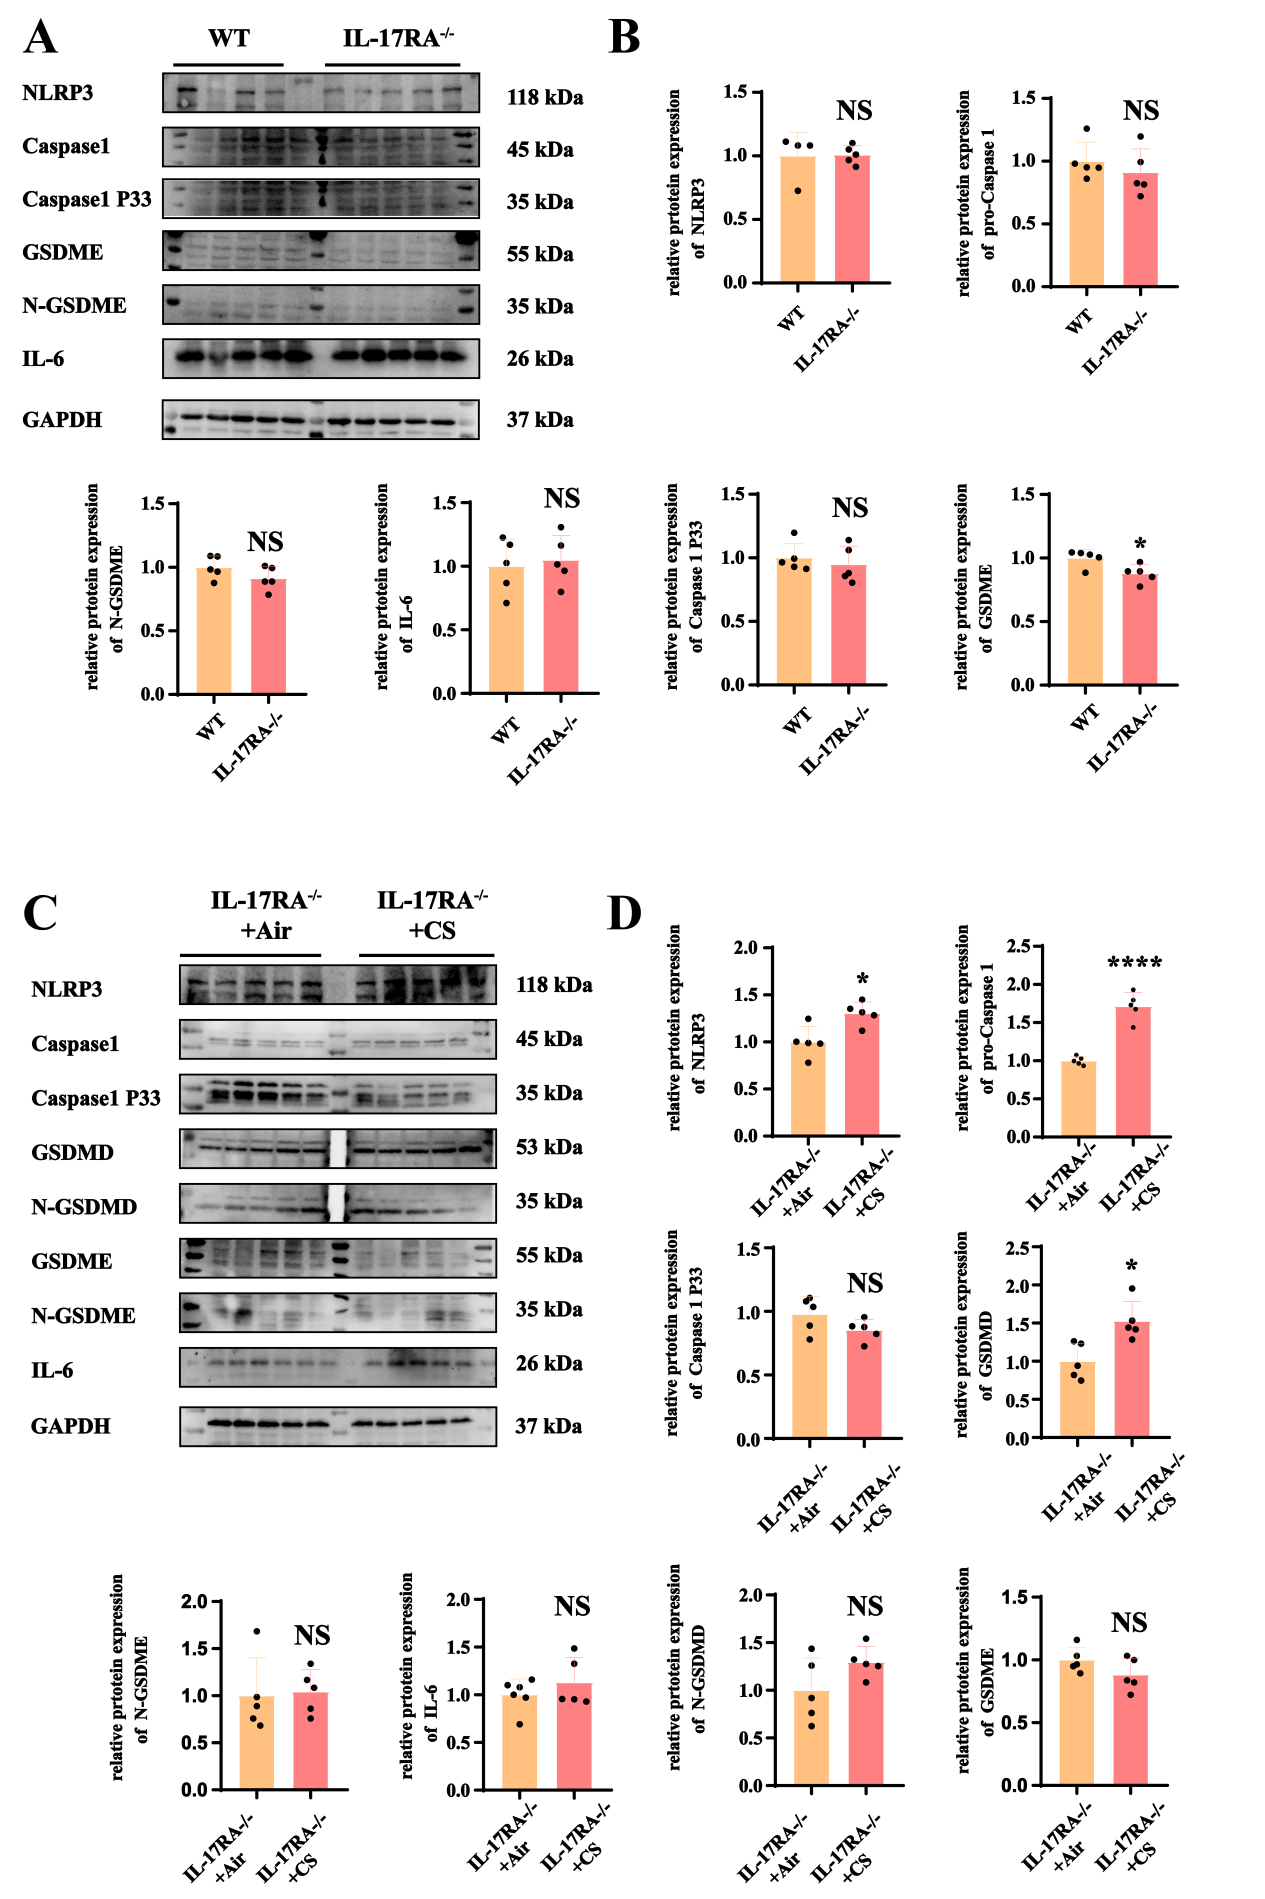


**Supplementary material 1** **WT, IL-17RA-/-, IL-17RA-/- + CS mouse lung tissue protein expression**

**A-B.** Expression **(A)** and Statistical chart **(B)** of NLRP3. Caspase 1. Caspase 1 p33. N-GSDME. GSDME. IL-6 protein in WT and IL-17RA-/- mouse. **C-D**. Expression **(C)** and Statistical chart **(D)** of NLRP3. Caspase 1. Caspase 1 p33. GSDMD. N-GSDMD. GSDME. N-GSDME. IL-6 protein in IL-17RA-/- + Air and IL-17RA-/- + COPD mouse
